# Supplementary material for: Multicenter Clinical Evaluation of BacT/Alert Virtuo Blood Culture System
Source: PubMed Central journal article supplement (PMC5527419; doi:10.1128/jcm.00307-17), 2017-07-25
Supplement: JCM.00307-17_zjm999095591s1.pdf [file JCM.00307-17_zjm999095591s1.pdf]

Supplemental Table S1. Numbers of clinically significant isolates by species and recognition by instrument, VIRTUO and/or BTA3D, and by volume compliance group.

|                             |                                                 | Volume compliance status of bottle pairs |                              |                                      |                       |                              |                                      |                       |                              |                                      | All bottle pairs      |                              |                                      |
|-----------------------------|-------------------------------------------------|------------------------------------------|------------------------------|--------------------------------------|-----------------------|------------------------------|--------------------------------------|-----------------------|------------------------------|--------------------------------------|-----------------------|------------------------------|--------------------------------------|
|                             |                                                 | Compliant                                |                              |                                      | Non-compliant, ≤10mL  |                              |                                      | Non-compliant, >10mL  |                              |                                      |                       |                              |                                      |
| Organism group              | Organism species                                | Significant positives                    | Detected by both instruments | Detected by VIRTUO only ; BTA3D only | Significant positives | Detected by both instruments | Detected by VIRTUO only ; BTA3D only | Significant positives | Detected by both instruments | Detected by VIRTUO only ; BTA3D only | Significant positives | Detected by both instruments | Detected by VIRTUO only ; BTA3D only |
| Staphylococci               | <i>Staphylococcus aureus</i>                    | 45                                       | 31                           | 8 ; 6                                | 15                    | 11                           | 2 ; 2                                | 12                    | 9                            | 1 ; 2                                | 72                    | 51                           | 11 ; 10                              |
|                             | <i>Staphylococcus epidermidis</i>               | 23                                       | 12                           | 4 ; 7                                | 10                    | 6                            | 1 ; 3                                | 8                     | 4                            | 3 ; 1                                | 41                    | 22                           | 8 ; 11                               |
|                             | <i>Staphylococcus spp.</i> , other              | 8                                        | 5                            | 1 ; 2                                | 2                     | 1                            | 1 ; 0                                | 1                     | 1                            | 0 ; 0                                | 11                    | 7                            | 2 ; 2                                |
| Streptococci                | <i>Streptococcus agalactiae</i>                 | 2                                        | 2                            | 0 ; 0                                | 2                     | 2                            | 0 ; 0                                | 3                     | 2                            | 0 ; 1                                | 7                     | 6                            | 0 ; 1                                |
|                             | <i>Streptococcus pyogenes</i>                   | 1                                        | 0                            | 1 ; 0                                | 1                     | 1                            | 0 ; 0                                | 3                     | 2                            | 0 ; 1                                | 5                     | 3                            | 1 ; 1                                |
|                             | <i>Streptococcus anginosus/constellatus</i>     | 4                                        | 3                            | 0 ; 1                                | 3                     | 2                            | 1 ; 0                                | 2                     | 2                            | 0 ; 0                                | 9                     | 7                            | 1 ; 1                                |
|                             | <i>Streptococcus gallolyticus</i>               | 2                                        | 2                            | 0 ; 0                                | 2                     | 2                            | 0 ; 0                                | 1                     | 1                            | 0 ; 0                                | 5                     | 5                            | 0 ; 0                                |
|                             | <i>Streptococcus, beta-hemolytic, group C/G</i> | - <sup>a</sup>                           | -                            | -                                    | 2                     | 0                            | 1 ; 1                                | -                     | -                            | -                                    | 2                     | 0                            | 1 ; 1                                |
|                             | <i>Streptococcus, viridans group, other</i>     | 1                                        | 0                            | 0 ; 1                                | -                     | -                            | -                                    | -                     | -                            | -                                    | 1                     | 0                            | 0 ; 1                                |
|                             | <i>Streptococcus pneumoniae</i>                 | 3                                        | 3                            | 0 ; 0                                | 1                     | 0                            | 1 ; 0                                | -                     | -                            | -                                    | 4                     | 3                            | 1 ; 0                                |
| Enterococci                 | <i>Enterococcus durans</i>                      | 1                                        | 1                            | 0 ; 0                                | -                     | -                            | -                                    | -                     | -                            | -                                    | 1                     | 1                            | 0 ; 0                                |
|                             | <i>Enterococcus faecalis</i>                    | 21                                       | 19                           | 1 ; 1                                | 3                     | 3                            | 0 ; 0                                | 7                     | 4                            | 3 ; 0                                | 31                    | 26                           | 4 ; 1                                |
|                             | <i>Enterococcus faecium</i>                     | 6                                        | 4                            | 0 ; 2                                | 1                     | 0                            | 1 ; 0                                | 2                     | 0                            | 1 ; 1                                | 9                     | 4                            | 2 ; 3                                |
|                             | <i>Enterococcus gallinarum</i>                  | 1                                        | 0                            | 1 ; 0                                | -                     | -                            | -                                    | -                     | -                            | -                                    | 1                     | 0                            | 1 ; 0                                |
| Gram positive bacilli       | <i>Corynebacterium spp.</i>                     | 1                                        | 1                            | 0 ; 0                                | -                     | -                            | -                                    | -                     | -                            | -                                    | 1                     | 1                            | 0 ; 0                                |
|                             | <i>Janibacter spp.</i>                          | -                                        | -                            | -                                    | -                     | -                            | -                                    | 1                     | 0                            | 1 ; 0                                | 1                     | 0                            | 1 ; 0                                |
|                             | <i>Lactobacillus spp.</i>                       | 1                                        | 0                            | 1 ; 0                                | -                     | -                            | -                                    | -                     | -                            | -                                    | 1                     | 0                            | 1 ; 0                                |
| Enterobacteriaceae          | <i>Enterobacter aerogenes</i>                   | 2                                        | 2                            | 0 ; 0                                | -                     | -                            | -                                    | 1                     | 0                            | 1 ; 0                                | 3                     | 2                            | 1 ; 0                                |
|                             | <i>Enterobacter asburiae</i>                    | 2                                        | 2                            | 0 ; 0                                | -                     | -                            | -                                    | -                     | -                            | -                                    | 2                     | 2                            | 0 ; 0                                |
|                             | <i>Enterobacter cloacae</i>                     | 5                                        | 3                            | 2 ; 0                                | 3                     | 2                            | 0 ; 1                                | 2                     | 1                            | 1 ; 0                                | 10                    | 6                            | 3 ; 1                                |
|                             | <i>Escherichia coli</i>                         | 33                                       | 22                           | 4 ; 7                                | 12                    | 8                            | 3 ; 1                                | 7                     | 5                            | 0 ; 2                                | 52                    | 35                           | 7 ; 10                               |
|                             | <i>Hafnia alvei</i>                             | -                                        | -                            | -                                    | -                     | -                            | -                                    | 1                     | 1                            | 0 ; 0                                | 1                     | 1                            | 0 ; 0                                |
|                             | <i>Klebsiella oxytoca</i>                       | 2                                        | 2                            | 0 ; 0                                | -                     | -                            | -                                    | -                     | -                            | -                                    | 2                     | 2                            | 0 ; 0                                |
|                             | <i>Klebsiella pneumoniae</i>                    | 16                                       | 15                           | 1 ; 0                                | 5                     | 0                            | 3 ; 2                                | 3                     | 3                            | 0 ; 0                                | 24                    | 18                           | 4 ; 2                                |
|                             | <i>Proteus spp.</i>                             | 4                                        | 2                            | 2 ; 0                                | 1                     | 0                            | 0 ; 1                                | -                     | -                            | -                                    | 5                     | 2                            | 2 ; 1                                |
| <i>Salmonella spp.</i>      | 2                                               | 2                                        | 0 ; 0                        | -                                    | -                     | -                            | -                                    | -                     | -                            | 2                                    | 2                     | 0 ; 0                        |                                      |
| Other Gram negative bacilli | <i>Haemophilus influenzae</i>                   | 1                                        | 0                            | 0 ; 1                                | -                     | -                            | -                                    | -                     | -                            | -                                    | 1                     | 0                            | 0 ; 1                                |
|                             | <i>Achromobacter xylosoxidans</i>               | -                                        | -                            | -                                    | -                     | -                            | -                                    | 1                     | 1                            | 0 ; 0                                | 1                     | 1                            | 0 ; 0                                |
|                             | <i>Acinetobacter baumannii</i>                  | 5                                        | 4                            | 1 ; 0                                | -                     | -                            | -                                    | 1                     | 0                            | 0 ; 1                                | 6                     | 4                            | 1 ; 1                                |
|                             | <i>Acinetobacter radioresistens</i>             | 1                                        | 0                            | 1 ; 0                                | -                     | -                            | -                                    | -                     | -                            | -                                    | 1                     | 0                            | 1 ; 0                                |
|                             | <i>Moraxella nonliquefaciens</i>                | 2                                        | 2                            | 0 ; 0                                | -                     | -                            | -                                    | -                     | -                            | -                                    | 2                     | 2                            | 0 ; 0                                |
|                             | <i>Pseudomonas aeruginosa</i>                   | 5                                        | 2                            | 1 ; 2                                | -                     | -                            | -                                    | 3                     | 1                            | 1 ; 1                                | 8                     | 3                            | 2 ; 3                                |
|                             | <i>Sphingomonas paucimobilis</i>                | 1                                        | 0                            | 1 ; 0                                | -                     | -                            | -                                    | -                     | -                            | -                                    | 1                     | 0                            | 1 ; 0                                |
| Mycobacteria                | <i>Mycobacterium fortuitum</i>                  | 1                                        | 1                            | 0 ; 0                                | -                     | -                            | -                                    | -                     | -                            | -                                    | 1                     | 1                            | 0 ; 0                                |
| Gram negative anaerobes     | <i>Bacteroides fragilis</i>                     | 2                                        | 1                            | 0 ; 1                                | -                     | -                            | -                                    | 1                     | 1                            | 0 ; 0                                | 3                     | 2                            | 0 ; 1                                |
|                             | <i>Fusobacterium nucleatum</i>                  | 1                                        | 0                            | 0 ; 1                                | -                     | -                            | -                                    | -                     | -                            | -                                    | 1                     | 0                            | 0 ; 1                                |
|                             | <i>Leptotrichia buccalis</i>                    | 1                                        | 0                            | 1 ; 0                                | -                     | -                            | -                                    | -                     | -                            | -                                    | 1                     | 0                            | 1 ; 0                                |
| Gram positive anaerobes     | <i>Actinomyces spp.</i>                         | 1                                        | 0                            | 1 ; 0                                | -                     | -                            | -                                    | -                     | -                            | -                                    | 1                     | 0                            | 1 ; 0                                |
|                             | <i>Clostridium spp.</i>                         | 1                                        | 0                            | 0 ; 1                                | -                     | -                            | -                                    | -                     | -                            | -                                    | 1                     | 0                            | 0 ; 1                                |
|                             | <i>Propionibacterium acnes</i>                  | 1                                        | 0                            | 0 ; 1                                | -                     | -                            | -                                    | -                     | -                            | -                                    | 1                     | 0                            | 0 ; 1                                |
| Yeast                       | <i>Candida albicans</i>                         | 7                                        | 5                            | 2 ; 0                                | 2                     | 1                            | 0 ; 1                                | 17                    | 10                           | 5 ; 2                                | 26                    | 16                           | 7 ; 3                                |
|                             | <i>Candida glabrata</i>                         | -                                        | -                            | -                                    | -                     | -                            | -                                    | 2                     | 0                            | 2 ; 0                                | 2                     | 0                            | 2 ; 0                                |
|                             | <i>Candida parapsilosis</i>                     | 1                                        | 1                            | 0 ; 0                                | -                     | -                            | -                                    | -                     | -                            | -                                    | 1                     | 1                            | 0 ; 0                                |
| Total                       |                                                 | 217                                      | 149                          | 34 ; 34                              | 65                    | 39                           | 14 ; 12                              | 79                    | 48                           | 19 ; 12                              | 361                   | 236                          | 67 ; 58                              |

<sup>a</sup>No isolates of this species from this volume compliance group
